# Supplementary material for: Glacier change along West Antarctica's Marie Byrd Land Sector and links to inter-decadal atmosphere–ocean variability
Source: Copernicus journal article supplement (doi:10.5194/tc-12-2461-2018), 2018-07-26
Supplement: Supplementary file 1 [file Data Set S1.xlsx]

## Sheet: Scene List
Year
2002/2003	2008	2010	2015
LE70171122002327EDC00	LE70101132007340EDC00	LE70291152010001ASN00	LC80061122015006LGN00
LE70161122002336EDC00	LE70271152007347EDC00	LE70291162010001ASN00	LC81961292015009LGN00
LE70281142002340EDC00	LE70251162007349ASN00	LE70271162010003EDC00	LC80181132015010LGN00
LE70281152002340EDC00	LE70231152007351ASN00	LE70181122010004EDC00	LC81941292015011LGN00
LE70191122002341EDC02	LE70231162007351ASN00	LE70181132010004EDC00	LC80321152015012LGN00
LE70191132002341EDC02	LE70241152007358ASN00	LE70251132010005ASN00	LC81671312015014LGN00
LE70191142002341EDC02	LE70221162007360ASN00	LE70251142010005ASN00	LC82221122015015LGN00
LE70261132002342EDC03	LE70111132007363EDC00	LE70251152010005ASN00	LC80171132015019LGN00
LE70261142002342EDC03	LE70271142007363EDC00	LE70251162010005ASN00	LC80171142015019LGN00
LE70261152002342EDC03	LE70271152007363EDC00	LE70161122010006EDC00	LC80241122015020LGN00
LE70261162002342EDC03	LE70091132007365ASN00	LE70231162010007ASN00	LC80241132015020LGN00
LE70241132002344EDC00	LE70251142007365EDC02	LE70301152010008ASN00	LC80241142015020LGN00
LE70131122002347PFS00	LE70251152007365EDC02	LE70301162010008ASN00	LC81931282015020LGN00
LE70131132002347PFS00	LE70161122008001ASN00	LE70191122010011EDC00	LC81931292015020LGN00
LE70271142002349EDC00	LE70161132008001ASN00	LE70191132010011EDC00	LC80151122015021LGN00
LE70271152002349EDC00	LE70231132008002ASN00	LE70101132010012ASN00	LC80151132015021LGN00
LE70231132002353EDC00	LE70141132008003EDC00	LE70261132010012EDC00	LC80271162015025LGN00
LE70141122002354EDC00	LE70121132008005EDC00	LE70261142010012EDC00	LC81961282015025LGN00
LE70141132002354EDC00	LE70081132008009ASN00	LE70311142010015EDC00	LC80301152015030LGN00
LE70211132002355EDC00	LE70151122008010EDC00	LE70311152010015EDC00	LC80211162015031LGN00
LE70121122002356EDC00	LE70151132008010EDC00	LE70311162010015EDC00	LC80281152015032LGN00
LE70121132002356EDC00	LE70221132008011EDC00	LE70111122010019ASN00	LC80191142015033LGN00
LE70221162002362EDC00	LE70321152008017EDC00	LE70111132010019ASN00	LC80351152015033LGN00
LE70291142002363EDC00	LE70231162008018EDC00	LE70271142010019EDC00	LC80101132015034LGN00
LE70201122002364EDC00	LE70281152008021EDC00	LE70181132010020EDC00	LC80261142015034LGN00
LE70201132002364EDC00	LE70281142008021EDC00	LE70251132010021EDC00	LC80261152015034LGN00
LE70271142002365EDC00	LE70101122008023EDC00	LE70251142010021EDC00	LC80291132015039LGN00
LE70341152003001EDC00	LE70101132008023EDC00	LE70251152010021EDC00	LC80251162015043LGN00
LE70231152003004EDC01	LE70171122008024EDC00	LE70321152010022EDC00	LC80231142015045LGN00
LE70281162003007EDC00	LE70171132008024EDC00	LE70231132010023ASN00	LC80261142015050LGN00
LE70261162003009EDC00	LE70151122008026EDC00	LE70231142010023ASN00	LC80261152015050LGN00
LE70171132003010EDC00	LE70151132008026EDC00	LE70141122010024ASN00	LC82301112015055LGN00
LE70331152003010EDC00	LE70161132008033EDC00	LE70301152010024EDC00	LC80271142015057LGN00
LE70151132003012EDC00	LE70231132008034ASN00	LE70281142010026EDC00	LC80091132015059LGN00
LE70221132003013EDC00	LE70301142008035ASN00	LE70281152010026EDC00	LC80241152015068LGN00
LE70221142003013EDC00	LE70241132008041ASN00	LE70281162010026EDC00	LC80151132015069LGN00
LE70131132003014EDC00	LE70131132008044EDC00	LE70191122010027EDC00	LC80111132015073LGN00
LE70271152003016EDC00	LE70291142008044ASN00	LE70211142010025EDC00	LC82331112015076LGN00
LE70271162003016EDC00	LE70291152008044ASN00	LE70101122010028EDC00	LC82331122015076LGN00
	LE70291162008044ASN00	LE70101132010028EDC00	LC82311112015078LGN00
AST_L1T_00301092003111523_20150426164256_82400_V	LE70201132008045ASN00	LE70261142010028EDC00	LC82231112015086LGN00
AST_L1T_00301112003110305_20150429124821_2655_V	LE70201142008045ASN00	LE70171122010029EDC00	LC82231122015086LGN00
AST_L1T_00301112003110313_20150429124823_67808_V	LE70201162008045ASN00	LE70171132010029EDC00
AST_L1T_00302152003180354_20150429003826_1378_V	LE70111132008046EDC00	LE70241142010030ASN00
AST_L1T_00302152003180403_20150427065607_11949_V	LE70161122008049ASN00	LE70341152010036EDC00
	LE70161132008049ASN00	LE70251162010037EDC00
	LE70231132008050ASN00	LE70161122010038EDC00
	LE70231152008050ASN00	LE70161132010038EDC00
	LE70211132008052ASN00	LE70231132010039EDC01
	LE70121122008053EDC00	LE70231152010039EDC01
	LE70121132008053EDC00	LE70231162010039EDC01
	LE70281142008053ASN00	LE70141132010040EDC01
	LE70191122008054ASN00	LE70121122010042ASN00
	LE70191132008054ASN00	LE70121132010042ASN00
	LE70261132008055EDC00	LE70191132010043EDC00
	LE70171122008056EDC00	LE70241162010046ASN00
	LE70171132008056EDC00	LE70311152010047EDC00
	LE70311162008058EDC00	LE70251162010053EDC00
	LE70301152008067EDC00	LE70221162010064EDC00
	LE70231142008066ASN00	LE70291152010065EDC00
	LE70301142008067EDC00	LE70211132010073EDC00
	LE70261162008071EDC00
	LE70171132008072EDC00
39/5	63	61	42
Total LS	205
Total AST	5
