# Supplementary material for: Glacier change along West Antarctica's Marie Byrd Land Sector and links to inter-decadal atmosphere–ocean variability
Source: Copernicus journal article supplement (doi:10.5194/tc-12-2461-2018), 2018-07-26
Supplement: Supplementary file 2 [file Data Set S2.xlsx]

## Sheet: Main_Coastline
Marie Byrd Land Coastline				GL Change Type
				Area bound by mapped Ib's (Km2)				Segment Ib Change (Km)				2-5 year Ib Area Change			2-5 year Ib Change			Rate in Change of Ib
												(Km2)			(Km)			(Km yr-1)
Segment	Region, Sub-coastal name	Notable Geographical Feature(s)	Glaciological Description	2003-2015	2008-2015	2010-2015		2003-2015	2008-2015	2010-2015		2003-2008	2010-2015		2003-2008	2010-2015		2003-2008	2010-2015
1	Martin Peninsula, Bakutis Coast	-	-	-1.30621	-1.59072	-0.247741		-0.0435402	-0.0530239	-0.00825803		0.284511	-0.247741		0.0094837	-0.00825803		0.00189674	-0.00165161
2	Martin Peninsula, Bakutis Coast	-	-	-0.894789	-1.98382	-1.77292		-0.0298263	-0.0661273	-0.0590975		1.08903	-1.77292		0.036301	-0.0590975		0.00726021	-0.0118195
3	Martin Peninsula, Getz Ice Shelf, Bakutis Coast	-	-	-1.79798	-1.52964	-2.05283		-0.0599328	-0.0509878	-0.0684277		-0.268349	-2.05283		-0.00894497	-0.0684277		-0.00178899	-0.0136855
4	Martin Peninsula, Getz Ice Shelf, Bakutis Coast	-	-	-0.53261	-0.302349	-0.374302		-0.0177537	-0.0100783	-0.0124767		-0.230261	-0.374302		-0.00767537	-0.0124767		-0.00153507	-0.00249535
5	Getz Ice Shelf, Bakutis Coast	-	-	-2.81747	-2.15543	-1.59352		-0.0939158	-0.0718477	-0.0531175		-0.662042	-1.59352		-0.0220681	-0.0531175		-0.00441361	-0.0106235
6	Getz Ice Shelf, Bakutis Coast	-	-	-6.26595	-4.16276	-4.26522		-0.208865	-0.138759	-0.142174		-2.10319	-4.26522		-0.0701063	-0.142174		-0.0140213	-0.0284348
7	Getz Ice Shelf, Bakutis Coast	AN77423S11637W	Outlet Glacier	-4.03902	-1.21725	-0.751144		-0.134634	-0.040575	-0.0250381		-2.82177	-0.751144		-0.0940592	-0.0250381		-0.0188118	-0.00500763
8	Getz Ice Shelf, Bakutis Coast	AN77423S11637W	Outlet Glacier	-3.0282	1.59339	-2.70834		-0.10094	0.0531131	-0.0902782		-4.62159	-2.70834		-0.154053	-0.0902782		-0.0308106	-0.0180556
9	Scott Peninsula, Getz Ice Shelf, Bakutis Coast	-	-	-51.8373	-4.45592	-3.70225		-1.72791	-0.148531	-0.123408		-47.3814	-2.70834		-1.57938	-0.123408		-0.315876	-0.0246816
10	Scott Peninsula, Getz Ice Shelf, Bakutis Coast	-	-	-12.8615	-8.35926	-5.90348		-0.428718	-0.278642	-0.196783		-4.50228	-5.90348		-0.150076	-0.196783		-0.0300152	-0.0393565
11	Scott Peninsula, Getz Ice Shelf, Bakutis Coast	-	-	-3.95221	-1.3746	-1.13296		-0.13174	-0.0458201	-0.0377653		-2.5776	-1.13296		-0.0859201	-0.0377653		-0.017184	-0.00755306
12	Scott Peninsula, Getz Ice Shelf, Bakutis Coast	-	-	-16.8383	-12.6861	-4.33519		-0.561278	-0.42287	-0.144506		-4.15223	-4.33519		-0.138408	-0.144506		-0.0276816	-0.0289013
13	Getz Ice Shelf, Bakutis Coast	AN77420S11950W	Fast Flow Ice Stream/Shelf	-7.16904	-8.64054	0		-0.238968	-0.288018	0		1.4715	0		0.0490501	0		0.00981001	0
14	Getz Ice Shelf, Bakutis Coast	AN77420S11950W	Fast Flow Ice Stream/Shelf	-23.3915	-5.24694	-4.62677		-0.779717	-0.174898	-0.154226		-18.1446	-4.62677		-0.604819	-0.154226		-0.120964	-0.0308451
15	Getz Ice Shelf, Bakutis Coast	-	-	3.31017	4.30088	4.94039		0.110339	0.143363	0.16468		-0.990716	4.94039		-0.0330239	0.16468		-0.00660477	0.0329359
16	Getz Ice Shelf, Bakutis Coast	-	-	-19.2192	-14.1064	-13.8337		-0.640639	-0.470212	-0.461123		-5.11282	-13.8337		-0.170427	-0.461123		-0.0340855	-0.0922247
17	Getz Ice Shelf, Bakutis Coast	-	-	-5.60301	-4.40394	-3.21758		-0.186767	-0.146798	-0.107253		-1.19907	-3.21758		-0.039969	-0.107253		-0.0079938	-0.0214505
18	Getz Ice Shelf, Bakutis Coast	-	-	-10.1185	-1.33161	-1.40374		-0.337282	-0.044387	-0.0467915		-8.78685	-1.40374		-0.292895	-0.0467915		-0.058579	-0.0093583
19	Getz Ice Shelf, Bakutis Coast	-	-	-23.0204	-16.0608	-14.7738		-0.767348	-0.53536	-0.492459		-6.95964	-14.7738		-0.231988	-0.492459		-0.0463976	-0.0984918
20	Getz Ice Shelf, Bakutis Coast	-	-	-5.85469	-4.46334	-5.53738		-0.195156	-0.148778	-0.184579		-1.39135	-5.53738		-0.0463785	-0.184579		-0.0092757	-0.0369158
21	Getz Ice Shelf, Bakutis Coast	AN77444S12542W	Ice Stream	-16.7772	-2.52764	-2.50472		-0.559238	-0.0842546	-0.0834907		-14.2495	-2.50472		-0.474984	-0.0834907		-0.0949968	-0.0166981
22	Getz Ice Shelf, Bakutis Coast	-	-	-23.0445	-6.51375	-6.27892		-0.768149	-0.217125	-0.209297		-16.5307	-6.27892		-0.551024	-0.209297		-0.110205	-0.0418595
23	Getz Ice Shelf, Hobbs Coast	-	-	-20.9102	-10.4055	-10.104		-0.697007	-0.346849	-0.3368		-10.5047	-10.104		-0.350158	-0.3368		-0.0700317	-0.06736
24	Getz Ice Shelf, Hobbs Coast	-	-	-13.8481	-10.2273	-8.00006		-0.461602	-0.340911	-0.266669		-3.62073	-8.00006		-0.120691	-0.266669		-0.0241382	-0.0533337
25	Getz Ice Shelf, Hobbs Coast	AN77452S12919W	Outlet Glacier	-3.01113	-2.70909	-1.6056		-0.100371	-0.0903029	-0.0535199		-0.302047	-1.6056		-0.0100682	-0.0535199		-0.00201365	-0.010704
26	Getz Ice Shelf, Hobbs Coast	AN77455S12957W	Outlet Glacier	-2.14087	0.275494	-0.333958		-0.0713622	0.00918313	-0.0111319		-2.41636	-0.333958		-0.0805454	-0.0111319		-0.0161091	-0.00222639
XXX	Getz Ice Shelf, Hobbs Coast	De Vicq Glacier	Ice Stream	N/A	N/A	N/A		N/A	N/A	N/A		N/A	N/A		N/A	N/A		N/A	N/A
27	Getz Ice Shelf, Hobbs Coast	-	-	-6.46444	-6.61267	-6.67606		-0.215481	-0.220422	-0.222535		0.148235	-6.67606		0.00494117	-0.222535		0.000988233	-0.0445071
28	Getz Ice Shelf, Hobbs Coast	-	-	-28.9821	-16.938	-2.80971		-0.966069	-0.5646	-0.0936571		-12.0441	-2.80971		-0.40147	-0.0936571		-0.080294	-0.0187314
29	Getz Ice Shelf, Hobbs Coast	-	-	-0.493336	-0.508637	-0.648641		-0.0164445	-0.0169546	-0.0216214		0.015301	-0.648641		0.000510033	-0.0216214		0.000102007	-0.00432427
XXX	Getz Ice Shelf, Hobbs Coast	Berry Glacier	Outlet Glacier	N/A	N/A	N/A		N/A	N/A	N/A		N/A	N/A		N/A	N/A		N/A	N/A
30	Cape Bakutis, Getz Ice Shelf, Hobbs Coast	Venzke Glacier, Johnson Glacier	Outlet Glacier, Outlet Glacier	-31.3504	-2.56688	-2.36943		-1.04501	-0.0855626	-0.0789809		-28.7836	-2.36943		-0.959452	-0.0789809		-0.19189	-0.0157962
31	Cape Bakutis, Hobbs Coast	-	-	-7.917	-6.16711	-5.28417		-0.2639	-0.20557	-0.176139		-1.74989	-5.28417		-0.0583297	-0.176139		-0.0116659	-0.0352278
32	Cape Bakutis, Hobbs Coast	-	-	-2.22052	-2.3457	-2.57996		-0.0740173	-0.0781901	-0.0859985		0.125185	-2.57996		0.00417283	-0.0859985		0.000834567	-0.0171997
33	Cape Bakutis, Hobbs Coast	Jackson Glacier	Outlet Glacier	-1.94255	-1.3471	-1.02052		-0.0647517	-0.0449035	-0.0340174		-0.595447	-1.02052		-0.0198482	-0.0340174		-0.00396965	-0.00680347
34	Cape Bakutis, Hobbs Coast		-	-3.5838	-2.97328	-3.60568		-0.11946	-0.0991093	-0.120189		-0.610522	-3.60568		-0.0203507	-0.120189		-0.00407015	-0.0240378
35	Hull Bay, Ruppert Coast	Perkins Glacier, Garfield Glacier	Outlet Glacier, Outlet Glacier	-7.38938	-2.08007	-1.86341		-0.246313	-0.0693358	-0.0621137		-5.30931	-1.86341		-0.176977	-0.0621137		-0.0353954	-0.0124227
36	Hull Bay, Ruppert Coast	-	-	-2.68801	-1.91555	-0.440782		-0.0896003	-0.0638516	-0.0146927		-0.772461	-0.440782		-0.0257487	-0.0146927		-0.00514974	-0.00293855
37	Hull Bay, Ruppert Coast	Kirkpatrick Glacier, Hull Glacier, Rubey Glacier	Outlet Glacier, Outlet Glacier, Outlet Glacier	-1.81316	-1.04559	-1.14455		-0.0604388	-0.0348529	-0.0381517		-0.767577	-1.14455		-0.0255859	-0.0381517		-0.00511718	-0.00763035
38	Hull Bay, Ruppert Coast	-	-	-4.69696	-2.10516	-2.84101		-0.156565	-0.0701721	-0.0947003		-2.5918	-2.84101		-0.0863932	-0.0947003		-0.0172786	-0.0189401
39	Hull Bay, Ruppert Coast	Frostman Glacier, Lord Glacier	Outlet Glacier, Outlet Glacier	-3.55575	-3.7294	-3.66279		-0.118525	-0.124313	-0.122093		0.173651	-3.66279		0.00578837	-0.122093		0.00115767	-0.0244186
40	Hull Bay, Ruppert Coast	Clarke Glacier	Outlet Glacier	-5.40746	-1.74169	-3.93509		-0.180249	-0.0580562	-0.13117		-3.66577	-3.93509		-0.122192	-0.13117		-0.0244385	-0.0262339
41	Land Bay, Ruppert Coast	Shuman Glacier, AN77517S13952W, Strauss Glacier,	Outlet Glacier, Outlet Glacier, Outlet Glacier	-5.33821	-6.13955	0.75174		-0.17794	-0.204652	0.025058		0.801341	0.75174		0.0267114	0.025058		0.00534227	0.0050116
42	Land Bay, Ruppert Coast	Anandakrishnan Glacier	Outlet Glacier	-2.49699	-1.20857	-1.73081		-0.0832329	-0.0402858	-0.0576937		-1.28841	-1.73081		-0.0429471	-0.0576937		-0.00858943	-0.0115387
43	Land Bay, Ruppert Coast	-	-	-4.26648	-2.5349	-3.03727		-0.142216	-0.0844966	-0.101242		-1.73158	-3.03727		-0.0577195	-0.101242		-0.0115439	-0.0202484
44	Land Bay, Ruppert Coast	White Glacier, Paschal Glacier, Land Glacier	Outlet Glacier, Outlet Glacier, Outlet Glacier	-7.48751	-0.160129	-0.972301		-0.249584	-0.00533763	-0.03241		-7.32738	-0.972301		-0.244246	-0.03241		-0.0488492	-0.00648201
45	Land Bay, Ruppert Coast	Land Glacier, Farbo Glacier, Elsayed Glacier	Outlet Glacier, Outlet Glacier, Outlet Glacier	-16.142	-14.6563	-12.5965		-0.538066	-0.488543	-0.419882		-1.48569	-12.5965		-0.0495231	-0.419882		-0.00990461	-0.0839765
46	Land Bay, Ruppert Coast	-	-	-2.67862	-1.71056	-1.24095		-0.0892874	-0.0570185	-0.0413651		-0.968066	-1.24095		-0.0322689	-0.0413651		-0.00645377	-0.00827303
47	Nickerson Ice Shelf, Ruppert Coast	Holcomb Glacier	Outlet Glacier	-2.44528	-0.393275	0.524233		-0.0815095	-0.0131092	0.0174744		-2.05201	0.524233		-0.0684003	0.0174744		-0.0136801	0.00349489
48	Nickerson Ice Shelf, Ruppert Coast	AN77532S14338W	Outlet Glacier	-0.645772	-0.708741	-0.890867		-0.0215257	-0.0236247	-0.0296956		0.062969	-0.890867		0.00209897	-0.0296956		0.000419793	-0.00593911
49	Nickerson Ice Shelf, Ruppert Coast	-	-	-0.570498	-1.17357	-1.20877		-0.0190166	-0.0391189	-0.0402922		0.60307	-1.20877		0.0201023	-0.0402922		0.00402047	-0.00805844
50	Nickerson Ice Shelf, Ruppert Coast	Siemiatkowski Glacier	Outlet Glacier	-5.8707	-2.25017	-1.84246		-0.19569	-0.0750056	-0.0614155		-3.62054	-1.84246		-0.120685	-0.0614155		-0.0241369	-0.0122831
51	Nickerson Ice Shelf, Ruppert Coast	-	-	-0.856586	-0.223413	-0.433708		-0.0285529	-0.0074471	-0.0144569		-0.633173	-0.433708		-0.0211058	-0.0144569		-0.00422115	-0.00289139
52	Nickerson Ice Shelf, Ruppert Coast	-	-	-0.93553	-0.869395	-1.48807		-0.0311843	-0.0289798	-0.0496022		-0.066135	-1.48807		-0.0022045	-0.0496022		-0.0004409	-0.00992044
53	Block Bay, Nickerson Ice Shelf, Ruppert Coast	-	-	-4.28311	-3.09631	-3.0189		-0.14277	-0.10321	-0.10063		-1.18679	-3.0189		-0.0395598	-0.10063		-0.00791197	-0.020126
54	Block Bay, Nickerson Ice Shelf, Ruppert Coast	Balchien Glacier	Outlet Glacier	-4.70205	-2.60636	-2.14885		-0.156735	-0.0868788	-0.0716284		-2.09568	-2.14885		-0.069856	-0.0716284		-0.0139712	-0.0143257
55	Block Bay, Guest Peninsula, Nickerson Ice Shelf, Ruppert Coast	Ragle Glacier, Ochs Glacier	Outlet Glacier	-3.13745	-1.20985	-0.571111		-0.104582	-0.0403282	-0.019037		-1.9276	-0.571111		-0.0642533	-0.019037		-0.0128507	-0.00380741
56	Block Bay, Guest Peninsula, Nickerson Ice Shelf, Ruppert Coast	-	-	-1.05466	-0.687586	-0.148757		-0.0351555	-0.0229195	-0.00495857		-0.367078	-0.148757		-0.0122359	-0.00495857		-0.00244719	-0.000991713
57	Block Bay, Guest Peninsula, Nickerson Ice Shelf, Ruppert Coast	-	-	-1.61728	-0.886014	-0.712044		-0.0539093	-0.0295338	-0.0237348		-0.731265	-0.712044		-0.0243755	-0.0237348		-0.0048751	-0.00474696
58	Block Bay, Guest Peninsula, Nickerson Ice Shelf, Saunders Coast	-	-	-4.73522	-1.47733	-2.0606		-0.157841	-0.0492442	-0.0686867		-3.25789	-2.0606		-0.108596	-0.0686867		-0.0217193	-0.0137373
59	Sulzberger Ice Shelf, Guest Peninsula, Saunders Coast	-	-	-0.989959	0.010611	-0.787711		-0.0329986	0.0003537	-0.026257		-1.00057	-0.787711		-0.0333523	-0.026257		-0.00667047	-0.00525141
60	Sulzberger Ice Shelf, Guest Peninsula, Saunders Coast	-	-	-11.2507	-0.140404	-0.952179		-0.375024	-0.00468013	-0.0317393		-11.1103	-0.952179		-0.370343	-0.0317393		-0.0740687	-0.00634786
61	Sulzberger Ice Shelf, Guest Peninsula, Saunders Coast	-	-	-0.221486	0.620911	-0.162327		-0.00738287	0.020697	-0.0054109		-0.842397	-0.162327		-0.0280799	-0.0054109		-0.00561598	-0.00108218
62	Sulzberger Ice Shelf, Guest Peninsula, Saunders Coast	-	-	-0.625667	-0.61855	-0.501357		-0.0208556	-0.0206183	-0.0167119		-0.007117	-0.501357		-0.000237233	-0.0167119		-4.74467e-05	-0.00334238
63	Sulzberger Ice Shelf, Guest Peninsula, Saunders Coast	-	-	-3.34804	-1.61206	-1.7855		-0.111601	-0.0537352	-0.0595168		-1.73598	-1.7855		-0.0578659	-0.0595168		-0.0115732	-0.0119034
64	Sulzberger Ice Shelf, Guest Peninsula, Saunders Coast	-	-	-3.81596	-3.59597	-3.82311		-0.127199	-0.119866	-0.127437		-0.219993	-3.82311		-0.0073331	-0.127437		-0.00146662	-0.0254874
65	Sulzberger Ice Shelf, Saunders Coast	Crevasse Valley Glacier	Outlet Glacier	-3.29126	-1.50996	-1.25276		-0.109709	-0.0503319	-0.0417587		-1.78131	-1.25276		-0.0593769	-0.0417587		-0.0118754	-0.00835173
66	Sulzberger Ice Shelf, Saunders Coast	-	-	-3.36855	-1.40013	-0.906695		-0.112285	-0.046671	-0.0302232		-1.96842	-0.906695		-0.065614	-0.0302232		-0.0131228	-0.00604463
67	Sulzberger Ice Shelf, Saunders Coast	Arthur Glacier	Outlet Glacier	-1.87162	-2.16859	-1.27756		-0.0623875	-0.0722865	-0.0425854		0.296971	-1.27756		0.00989903	-0.0425854		0.00197981	-0.00851709
68	Sulzberger Ice Shelf, Saunders Coast	-	-	-2.17486	-1.15846	-0.991648		-0.0724955	-0.0386153	-0.0330549		-1.0164	-0.991648		-0.0338802	-0.0330549		-0.00677603	-0.00661099
69	Sulzberger Ice Shelf, Saunders Coast	-	-	-0.857591	-0.739614	-0.52801		-0.0285864	-0.0246538	-0.0176003		-0.117977	-0.52801		-0.00393257	-0.0176003		-0.000786513	-0.00352007
70	Sulzberger Ice Shelf, Saunders Coast	-	-	-1.82962	-0.492189	-0.140358		-0.0609874	-0.0164063	-0.0046786		-1.33743	-0.140358		-0.0445811	-0.0046786		-0.00891623	-0.00093572
71	Sulzberger Ice Shelf, Saunders Coast	Swope Glacier	Outlet Glacier	-2.80784	0.030075	-0.116579		-0.0935947	0.0010025	-0.00388597		-2.83792	-0.116579		-0.0945972	-0.00388597		-0.0189194	-0.000777193
72	Sulzberger Ice Shelf, Saunders Coast	Hammond Glacier	Ice Stream	-2.85771	-1.11143	-0.587869		-0.095257	-0.0370478	-0.0195956		-1.74628	-0.587869		-0.0582092	-0.0195956		-0.0116418	-0.00391913
73	Haines Mountains, Sulzberger Ice Shelf, Saunders Coast	Reynolds Glacier	Outlet Glacier	-2.37136	-0.777065	-0.207809		-0.0790454	-0.0259022	-0.00692697		-1.5943	-0.207809		-0.0531433	-0.00692697		-0.0106287	-0.00138539
74	Court Ridge, Sulzberger Ice Shelf, Saunders Coast	-	-	-1.57194	-1.4198	-0.608721		-0.0523978	-0.0473265	-0.0202907		-0.152139	-0.608721		-0.0050713	-0.0202907		-0.00101426	-0.00405814
75	Court Ridge, Sulzberger Ice Shelf, Saunders Coast	-	-	-0.654554	-0.298211	-0.306254		-0.0218185	-0.00994037	-0.0102085		-0.356343	-0.306254		-0.0118781	-0.0102085		-0.00237562	-0.00204169
76	Sulzberger Ice Shelf, Saunders Coast	-	-	-0.759522	-1.19005	-0.679278		-0.0253174	-0.0396683	-0.0226426		0.430526	-0.679278		0.0143509	-0.0226426		0.00287017	-0.00452852
77	Sulzberger Ice Shelf, Saunders Coast	-	-	-1.46855	-0.799397	-0.620542		-0.0489516	-0.0266466	-0.0206847		-0.66915	-0.620542		-0.022305	-0.0206847		-0.004461	-0.00413695
78	Sulzberger Ice Shelf, Saunders Coast	-	-	0.271667	0.138421	0.783304		0.00905557	0.00461403	0.0261101		0.133246	0.783304		0.00444153	0.0261101		0.000888307	0.00522203
79	Sulzberger Ice Shelf, Saunders Coast	-	-	-1.56528	-0.860151	-0.845458		-0.052176	-0.0286717	-0.0281819		-0.705129	-0.845458		-0.0235043	-0.0281819		-0.00470086	-0.00563639
80	Sulzberger Ice Shelf, Saunders Coast	-	-	-1.29383	-0.799778	-0.450533		-0.0431276	-0.0266593	-0.0150178		-0.494049	-0.450533		-0.0164683	-0.0150178		-0.00329366	-0.00300355
81	Sulzberger Ice Shelf, Saunders Coast	-	-	-1.04976	-0.708712	-0.206338		-0.0349919	-0.0236237	-0.00687793		-0.341045	-0.206338		-0.0113682	-0.00687793		-0.00227363	-0.00137559
82	Sulzberger Ice Shelf, Saunders Coast	Jacobel Glacier	Outlet Glacier	-3.11033	-2.03054	-0.01578		-0.103678	-0.0676846	-0.000526		-1.07979	-0.01578		-0.0359931	-0.000526		-0.00719862	-0.0001052
83	Sulzberger Ice Shelf, Saunders Coast	-	-	-6.72063	-6.71889	-3.36439		-0.224021	-0.223963	-0.112146		-0.001733	-3.36439		-5.77667e-05	-0.112146		-1.15533e-05	-0.0224292
84	Sulzberger Ice Shelf, Saunders Coast	Scambos Glacier	Ice Stream	-2.47302	-1.63426	-0.852794		-0.082434	-0.0544753	-0.0284265		-0.838761	-0.852794		-0.0279587	-0.0284265		-0.00559174	-0.00568529
85	Sulzberger Ice Shelf, Saunders Coast	Fahnestock Glacier, AN77743S15004W	Outlet Glacier, Outlet Glacier	-4.09043	-2.86146	-2.32749		-0.136348	-0.0953822	-0.0775831		-1.22896	-2.32749		-0.0409654	-0.0775831		-0.00819307	-0.0155166
86	Sulzberger Ice Shelf, Saunders Coast	-	-	-2.67996	-1.14747	-0.892555		-0.0893321	-0.038249	-0.0297518		-1.5325	-0.892555		-0.0510832	-0.0297518		-0.0102166	-0.00595037
87	Sulzberger Ice Shelf, Saunders Coast	Stewart Glacier	Outlet Glacier	-1.88077	-1.93012	-1.8624		-0.0626923	-0.0643375	-0.06208		0.049355	-1.8624		0.00164517	-0.06208		0.000329033	-0.012416
88	Sulzberger Ice Shelf, Saunders Coast	Gerry Glacier	Outlet Glacier	-1.62626	-1.61569	-2.28742		-0.0542087	-0.0538563	-0.0762474		-0.010573	-2.28742		-0.000352433	-0.0762474		-7.04867e-05	-0.0152495
89	Swinbourne Ice Shelf, Saunders Coast	Dalton Glacier	Outlet Glacier	-3.76656	-1.41424	-1.34914		-0.125552	-0.0471414	-0.0449714		-2.35232	-1.34914		-0.0784108	-0.0449714		-0.0156822	-0.00899429
90	Swinbourne Ice Shelf, Saunders Coast	Blades Glacier	Outlet Glacier	-0.8666	-1.90902	-0.752607		-0.0288867	-0.0636341	-0.0250869		1.04242	-0.752607		0.0347475	-0.0250869		0.00694949	-0.00501738
91	Swinbourne Ice Shelf, Saunders Coast	Larson Glacier, Butler Glacier	Ice Stream, Ice Stream	-2.05788	-2.21759	-0.795397		-0.0685959	-0.0739198	-0.0265132		0.159716	-0.795397		0.00532387	-0.0265132		0.00106477	-0.00530265
92	Swinbourne Ice Shelf, Saunders Coast	Cumbrie Glacier	Outlet Glacier	-1.27848	-4.13033	-2.45091		-0.0426161	-0.137678	-0.0816969		2.85184	-2.45091		0.0950614	-0.0816969		0.0190123	-0.0163394
93	Saunders Coast	AN77708S15443W	Outlet Glacier	-0.870141	-2.44126	-2.31142		-0.0290047	-0.0813752	-0.0770474		1.57112	-2.31142		0.0523705	-0.0770474		0.0104741	-0.0154095
94	Saunders Coast	Richter Glacier	Ice Stream	-1.7296	-2.25839	-1.66163		-0.0576533	-0.0752797	-0.0553878		0.528792	-1.66163		0.0176264	-0.0553878		0.00352528	-0.0110776
95	Bartlett Inlet, Saunders Coast	-	-	-0.404235	-0.596375	-1.63238		-0.0134745	-0.0198792	-0.0544127		0.19214	-1.63238		0.00640467	-0.0544127		0.00128093	-0.0108825
96	Bartlett Inlet, Saunders Coast	Withrow Glacier	Outlet Glacier	-3.60957	-3.13627	-2.32701		-0.120319	-0.104542	-0.0775669		-0.473301	-2.32701		-0.0157767	-0.0775669		-0.00315534	-0.0155134
97	Cape Colbeck, Bartlett Inlet, Saunders Coast	-	-	-0.612048	0.324418	-0.90799		-0.0204016	0.0108139	-0.0302663		-0.936466	-0.90799		-0.0312155	-0.0302663		-0.00624311	-0.00605327
98	Cape Colbeck, Saunders Coast	-	-	0.058588	0.16341	-1.1807		0.00195293	0.005447	-0.0393566		-0.104822	-1.1807		-0.00349407	-0.0393566		-0.000698813	-0.00787133

## Sheet: Islands
Marie Byrd Land Coastline				GL Change Type
				Area bound by mapped Ib's (Km2)				Segment Ib Change (Km)				2-5 year Ib Area Change			2-5 year Ib Change			Rate in Change of Ib
												(Km2)			(Km)			(Km yr-1)
Segment	Region, Sub-coastal name	Notable Geographical Feature(s)	Glaciological Description	2003-2015	2008-2015	2010-2015		2003-2015	2008-2015	2010-2015		2003-2008	2010-2015		2003-2008	2010-2015		2003-2008	2010-2015
Carney Island				Carney Island				Carney Island				Carney Island			Carney Island			Carney Island
C1	Getz Ice Shelf, Bakutis Coast	Beaklet Glacier	Outlet Glacier	-7.38546	-2.45757	-2.30593		-0.246182	-0.0819191	-0.0768642		-4.92789	-0.151646		-0.164263	-0.00505487		-0.0328526	-0.00101097
C2	Getz Ice Shelf, Bakutis Coast	-	-	-3.03803	-1.58623	N/A		-0.101268	-0.0528744	N/A		-1.4518	N/A		-0.0483934	N/A		-0.00967868	N/A
C3	Getz Ice Shelf, Bakutis Coast	-	-	-7.57997	-7.15338	N/A		-0.252666	-0.238446	N/A		-0.42659	N/A		-0.0142197	N/A		-0.00284393	N/A
C4	Getz Ice Shelf, Bakutis Coast	-	-	-9.39444	-13.8932	-10.1781		-0.313148	-0.463107	-0.339271		4.49878	-3.71509		0.149959	-0.123836		0.0299919	-0.0247673
C5	Getz Ice Shelf, Bakutis Coast	-	-	2.74305	-0.164141	-0.518299		0.0914348	-0.00547137	-0.0172766		2.90719	0.354158		0.0969062	0.0118053		0.0193812	0.00236105
C6	Getz Ice Shelf, Bakutis Coast	-	-	-3.0336	-1.0852	-1.0751		-0.10112	-0.0361732	-0.0358366		-1.9484	-0.010098		-0.0649466	-0.0003366		-0.0129893	-6.732e-05
C7	Getz Ice Shelf, Bakutis Coast	-	-	-2.83646	-1.95493	-2.09199		-0.0945488	-0.0651645	-0.0697332		-0.881529	0.13706		-0.0293843	0.00456867		-0.00587686	0.000913733
C8	Getz Ice Shelf, Bakutis Coast	-	-	-2.13	-18.2089	-0.72677		-0.071	-0.606963	-0.0242257		16.0789	-17.4821		0.535963	-0.582737		0.107193	-0.116547
C9	Getz Ice Shelf, Bakutis Coast	-	-	-6.05502	-1.95774	-1.80251		-0.201834	-0.0652581	-0.0600838		-4.09727	-0.155229		-0.136576	-0.0051743		-0.0273152	-0.00103486
C10	Getz Ice Shelf, Bakutis Coast	-	-	-2.9764	0.596359	2.06464		-0.0992132	0.0198786	0.0688213		-3.57275	-1.46828		-0.119092	-0.0489427		-0.0238184	-0.00978854
C11	Getz Ice Shelf, Bakutis Coast	-	-	-4.48546	-2.28222	-1.50173		-0.149515	-0.076074	-0.0500578		-2.20324	-0.780487		-0.0734414	-0.0260162		-0.0146883	-0.00520325
C12	Getz Ice Shelf, Bakutis Coast	-	-	-5.83051	-2.80498	-2.98707		-0.19435	-0.0934994	-0.099569		-3.02552	0.182088		-0.100851	0.0060696		-0.0201702	0.00121392
C13	Getz Ice Shelf, Bakutis Coast	-	-	-3.65993	-2.68252	-2.70197		-0.121998	-0.0894172	-0.0900656		-0.977411	0.019451		-0.0325804	0.000648367		-0.00651607	0.000129673
C14	Getz Ice Shelf, Bakutis Coast	AN77353S12032W	Outlet Glacier	-3.86732	-2.80791	-2.96888		-0.128911	-0.0935969	-0.0989626		-1.05941	0.160972		-0.0353137	0.00536573		-0.00706275	0.00107315
Siple Island				Siple Island				Siple Island				Siple Island			Siple Island			Siple Island
S1	Getz Ice Shelf, Bakutis Coast	-	-	-3.93579	-1.69685	-1.16827		-0.131193	-0.0565617	-0.0389422		-2.23894	-0.528584		-0.0746312	-0.0176195		-0.0149262	-0.00352389
S2	Getz Ice Shelf, Bakutis Coast	-	-	-1.52253	-3.71855	-2.8805		-0.050751	-0.123952	-0.0960167		2.19602	-0.838046		0.0732005	-0.0279349		0.0146401	-0.00558697
S3	Getz Ice Shelf, Bakutis Coast	-	-	-1.17193	-0.133214	-0.202145		-0.0390643	-0.00444047	-0.00673817		-1.03872	0.068931		-0.0346238	0.0022977		-0.00692477	0.00045954
S4	Getz Ice Shelf, Bakutis Coast	-	-	-5.86595	-2.6567	-5.49665		-0.195532	-0.0885565	-0.183222		-3.20925	2.83995		-0.106975	0.094665		-0.021395	0.018933
S5	Getz Ice Shelf, Bakutis Coast	-	-	-5.1113	-2.38755	-3.23589		-0.170377	-0.0795849	-0.107863		-2.72376	0.848338		-0.0907919	0.0282779		-0.0181584	0.00565559
S6	Getz Ice Shelf, Bakutis Coast	-	-	-0.883349	-0.529082	-0.442028		-0.029445	-0.0176361	-0.0147343		-0.354267	-0.087054		-0.0118089	-0.0029018		-0.00236178	-0.00058036
S7	Getz Ice Shelf, Hobbs Coast	-	-	-2.08204	-2.11964	-0.288452		-0.0694012	-0.0706545	-0.00961507		0.037598	-1.83118		0.00125327	-0.0610394		0.000250653	-0.0122079
S8	Getz Ice Shelf, Hobbs Coast	-	-	-0.978356	-0.051179	0.40752		-0.0326119	-0.00170597	0.013584		-0.927177	-0.458699		-0.0309059	-0.01529		-0.00618118	-0.00305799
S9	Getz Ice Shelf, Hobbs Coast	-	-	0.1913	0.155146	-0.848559		0.00637667	0.00517153	-0.0282853		0.036154	1.00371		0.00120513	0.0334568		0.000241027	0.00669137
S10	Getz Ice Shelf, Hobbs Coast	-	-	-3.02015	-4.11499	0.750365		-0.100672	-0.137166	0.0250122		1.09485	-4.86536		0.0364949	-0.162179		0.00729899	-0.0324357
S11	Getz Ice Shelf, Hobbs Coast	AN77322S12608W, Thurston Glacier	Outlet Glacier, Outlet Glacier	-1.99169	-0.908943	-0.968131		-0.0663896	-0.0302981	-0.032271		-1.08274	0.059188		-0.0360915	0.00197293		-0.0072183	0.000394587
S12	Russel Bay, Bakutis Coast	-	-	-2.89385	-1.46016	-1.28011		-0.0964615	-0.0486721	-0.0426704		-1.43368	-0.180051		-0.0477895	-0.0060017		-0.00955789	-0.00120034
S13	Russel Bay, Bakutis Coast	AN77334S12543W	Outlet Glacier	-5.94991	-1.79488	-1.5404		-0.19833	-0.0598295	-0.0513468		-4.15503	-0.25448		-0.138501	-0.00848267		-0.0277002	-0.00169653
S14	Getz Ice Shelf, Bakutis Coast	-	-	-3.46877	N/A	-0.027898		-0.115626	N/A	-0.000929933		N/A	-0.027898		N/A	-0.000929933		N/A	-0.000185987
S15	Armour Inlet, Getz Ice Shelf, Bakutis Coast	Hulbe Glacier	Outlet Glacier	-6.40994	N/A	-3.6499		-0.213665	N/A	-0.121663		N/A	-3.6499		N/A	-0.121663		N/A	-0.0243326
S16	Getz Ice Shelf, Bakutis Coast	Vornberger Glacier	Outlet Glacier	-1.3227	-0.250851	0.679863		-0.0440901	-0.0083617	0.0226621		-1.07185	-0.930714		-0.0357284	-0.0310238		-0.00714568	-0.00620476
S17	Getz Ice Shelf, Bakutis Coast	-	-	-2.65893	-3.00596	-1.50363		-0.0886309	-0.100199	-0.050121		0.347038	-1.50233		0.0115679	-0.0500778		0.00231359	-0.0100156
S18	Getz Ice Shelf, Bakutis Coast	AN77349S12431W, Nereson Glacier	Outlet Glacier	-3.85745	-2.46419	-2.13503		-0.128582	-0.0821397	-0.0711677		-1.39326	-0.32916		-0.046442	-0.010972		-0.0092884	-0.0021944
S19	Getz Ice Shelf, Bakutis Coast	-	-	-4.0293	-3.13385	-2.65313		-0.13431	-0.104462	-0.0884377		-0.89545	-0.48072		-0.0298483	-0.016024		-0.00596967	-0.0032048
S20	Getz Ice Shelf, Bakutis Coast	-	-	-4.59435	-1.1899	-0.655363		-0.153145	-0.0396635	-0.0218454		-3.40445	-0.534542		-0.113482	-0.0178181		-0.0226963	-0.00356361
