# Supplementary material for: Glacier change along West Antarctica's Marie Byrd Land Sector and links to inter-decadal atmosphere–ocean variability
Source: Copernicus journal article supplement (doi:10.5194/tc-12-2461-2018), 2018-07-26
Supplement: Supplementary file [file tc-12-2461-2018-supplement-title-page.pdf › tc-12-2461-2018-supplement-title-page.pdf]

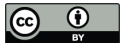

## *Supplement of*

# **Glacier change along West Antarctica's Marie Byrd Land Sector and links to inter-decadal atmosphere–ocean variability**

**Frazer D. W. Christie et al.**

*Correspondence to:* Robert Bingham ([r.bingham@ed.ac.uk](mailto:r.bingham@ed.ac.uk))

- [tc-12-2461-2018-supplement-title-page.pdf](#)
- [Supplementary\\_Information](#)
  - [.DS\\_Store](#)
  - [Christie\\_et\\_al\\_2018\\_supplementary\\_information.pdf](#)
  - [Data Set S1](#)
    - \* [.DS\\_Store](#)
    - \* [Data Set S1.xlsx](#)
  - [Data Set S2](#)
    - \* [.DS\\_Store](#)
    - \* [Data Set S2.xlsx](#)
  - [Thumbs.db](#)

The copyright of individual parts of the supplement might differ from the CC BY 4.0 License.
